# Supplementary material for: Modelling control of Schistosoma haematobium infection: predictions of the long-term impact of mass drug administration in Africa
Source: PubMed Central journal article supplement (PMC4618728; doi:10.1186/s13071-015-1144-3), 2015-10-22
Supplement: 13071_2015_1144_MOESM2_ESM.pdf [file 13071_2015_1144_MOESM2_ESM.pdf]

## B. Random egg-release and simulated egg-test diagnostics

Two factors determine egg-release by human hosts: the number of fertilized females  $\phi_k$  (in  $k$ -th stratum), and worm fecundity  $\rho_k$ . For estimating mated worm counts we follow [16, 12] which gives

$$\phi(w) = \frac{w}{2} \left[ 1 - 2^{-w} \binom{w}{w/2} \right]; \text{ or } \phi_k = \phi(k \Delta w) \quad (14)$$

for  $h_k$ -stratum. For worm fecundity,  $\rho(w)$  or  $\rho_k$  we assume exponential fall-off (“crowding effect”), given by function (1)

$$\rho(w) = \rho_0 e^{-w/w_0}; \text{ or } \rho_k = \rho(k \Delta w) = \rho_0 e^{-k/k_0} \quad (15)$$

with maximal value  $\rho_0$ , and threshold  $k_0 = \frac{w_0}{\Delta w}$ . Equations (14) - (15) predict mean egg-release by individual host in  $h_k$

$$E_k = \rho_k \phi_k \quad (16)$$

Observed egg-counts in diagnostic test data are typically overdispersed, while repeated tests on individual hosts show high day-to-day variability. So following [27], we choose to describe the egg-release process as random negative binomial (NB) variable in our current SWB approach. Specifically, a mated female in  $h_k$ -stratum is assumed to release random NB-count with *mean*  $\rho_k$  and aggregation parameter  $r$  (estimated based on our calibration). The resulting egg-release by  $h_k$ -hosts (carrying  $\phi_k$  mated worms) is also NB with mean  $E_k = \rho_k \phi_k$ , and aggregation  $r_k = r \phi_k$ . For the combined SWB

community  $\{h_k\}$ , observed egg-test results are random samples drawn from a mixed

NB distribution  $D_M = \sum_{k=0}^n h_k NB(E_k | r \phi_k)$ , as indicated in Figure 1.
