# Supplementary material for: Modelling control of Schistosoma haematobium infection: predictions of the long-term impact of mass drug administration in Africa
Source: PubMed Central journal article supplement (PMC4618728; doi:10.1186/s13071-015-1144-3), 2015-10-22
Supplement: 13071_2015_1144_MOESM4_ESM.pdf [file 13071_2015_1144_MOESM4_ESM.pdf]

### C. Snail population and transmission dynamics

*Dynamic variables* for the snail component of our model are population densities (per unit habitat) of  $x$ - susceptible snails;  $y$ - prepatent infected snails; and  $z$ -patent infected snails that are shedding *Schistosoma* cercariae; whereby  $N=x+y+z$ - total snails. All variables in this scheme represent adult populations, and the relation among them is shown in following SEI diagram

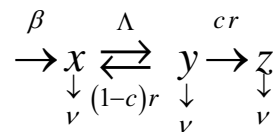

We assume logistic population growth  $\beta = \beta_0 (x + y)(1 - N / K)$ , with maximal reproduction rate  $\beta_0$  and carrying capacity  $K$ , and fixed snail mortality  $\nu$ . Only susceptible and prepatent snails ( $x + y$ ) can reproduce and contribute to growth. The transmission (SEI) part of the system has snail FOI,  $\Lambda$ , determined by the infective human population; prepatency rate  $r$  (period  $1/r$ ), and patency conversion fraction  $c$ . The combined population growth-SEI dynamics is described by 3 differential equations

$$\begin{aligned}
 \frac{dx}{dt} &= \beta - \Lambda x - \nu x + r(1-c)y \\
 \frac{dy}{dt} &= \Lambda x - (r + \nu)y \\
 \frac{dz}{dt} &= cr y - \nu z
 \end{aligned}$$

Parameter values and ranges for the snail system are given in Table 2. The force of snail infection,  $\Lambda$ , is a nonlinear (saturated) function of the total egg release by the human host population per snail

$$\Lambda = \Lambda_0 \left( 1 - \exp \left[ -b \omega \frac{H E}{N} \right] \right) \quad (17)$$

$H$  – host population size,  $E$  – mean per capita egg-release by hosts

$$E = E(\rho_0, k_0) = \sum_k \rho_k \phi_k h_k \quad (18)$$

The key inputs in  $\Lambda$  are sporocyst establishment rate  $\Lambda_0$ , and transmission coefficient

$B = \alpha \beta_M$  (product of miracidium coefficient,  $\beta_M$ , times snail susceptibility,  $\alpha$ ).

In coupled human-snail systems, human FOI  $\lambda = a \omega z$ , is the product of exposure (contact) rate  $\omega$ , patent snail density  $z$ , and transmission coefficient  $A$  that depends on cercarial production/mortality, and the probability of worm establishment in the human host.

Two transmission rates  $A = a \omega$ ;  $B = b \omega$  of the coupled system could be estimated from the known demographic and infection data for a given environment.
